# Complex-centric proteome profiling by SEC-SWATH-MS

Moritz Heusel<sup>1,2,6</sup>, Isabell Bludau<sup>1,3,6</sup>, George Rosenberger<sup>1</sup>, Robin Hafen<sup>1,4</sup>, Max Frank<sup>1</sup>, Amir Banaei-Esfahani<sup>1,3</sup>, Ben C. Collins<sup>1</sup>, Matthias Gstaiger<sup>1,\*</sup>, Ruedi Aebersold<sup>1,5,\*</sup>.

1 Institute of Molecular Systems Biology, Department of Biology, ETH Zurich, Zurich

2 PhD program in Molecular and Translational Biomedicine of the Competence Center Personalized Medicine UZH/ETH, Zurich, Switzerland

3 PhD Program in Systems Biology, Life Science Zurich Graduate School, University of Zurich and ETH Zurich, Zurich, Switzerland

4 Department of Computer Science, ETH Zurich

5 Faculty of Science, University of Zurich, Zurich, Switzerland.

6 Authors contributed equally

\* Corresponding author

Character count: 56.070

## 1 Highlights

- 2 • Introduction of the concept of complex-centric proteome profiling
- 3 • Development of *CCprofiler*, a software framework for complex-centric data analysis
- 4 • Detection and quantification of subunit distribution of 462 distinct protein complexes
- 5 containing 2127 proteins from a SEC-SWATH-MS dataset of HEK293 cells, and identification
- 6 of novel complex variants such as assembly intermediates
- 7 • Statistical target-decoy model to estimate accurate false discovery rates for complexes
- 8 quantified by complex-centric analysis
- 9 • *SECexplorer*, an online platform to support custom complex-centric exploration of SEC-
- 10 SWATH-MS datasets.

## 11 Abstract

12 Proteins are major effectors and regulators of biological processes that can elicit multiple functions  
13 depending on their interaction with other proteins. The organization of proteins into  
14 macromolecular complexes and their quantitative distribution across these complexes is, therefore,  
15 of great biological and clinical significance.

16 In this paper we describe an integrated experimental and computational technique to quantify  
17 hundreds of protein complexes in a single operation. The method consists of size exclusion  
18 chromatography (SEC) to fractionate native protein complexes, SWATH/DIA mass spectrometry to  
19 precisely quantify the proteins in each SEC fraction and the computational framework *CCprofiler* to  
20 detect and quantify protein complexes by error-controlled, complex-centric analysis using prior  
21 information from generic protein interaction maps.

22 Our analysis of the HEK293 cell line proteome delineates 462 complexes composed of 2127 protein  
23 subunits. The technique identifies novel subcomplexes and assembly intermediates of central  
24 regulatory complexes while assessing the quantitative subunit distribution across them. We make  
25 the toolset *CCprofiler* freely accessible, and provide a web platform, *SECexplorer*, for custom  
26 exploration of the HEK293 proteome modularity.

## 27 Introduction

28 Molecular life science research over the last decades has been transformed by technological  
29 advances that aim at exploring biological processes as complex systems of interacting molecules. A  
30 range of high throughput technologies to analyze genomes, transcriptomes, metabolomes and  
31 proteomes now provide accurate molecular inventories of biological samples at high throughput. Yet,  
32 the notion of a modular biology<sup>1</sup> states that for the definition of the functional state of a cell the  
33 organization of cellular molecules into functional modules is as important as the composition of the  
34 respective “omes”. This notion has been supported by decades of research into the structure and  
35 function of specific macromolecular complexes but the task to systematically probe the organization  
36 of biomolecules in the cell has remained technologically challenging. Among all macromolecular  
37 modules those containing or consisting of proteins are particularly functionally important because  
38 they catalyze and control the vast majority of biochemical functions and constantly adapt to and  
39 determine the state of the cell.

40 For high throughput analytical techniques to generate data sets that are quantitative, reproducible  
41 and contain low error rates it has frequently been useful to use prior information to guide the  
42 acquisition or analysis of the respective data<sup>2</sup>. For mass spectrometry-based proteomics, the concept  
43 of peptide-centric analysis<sup>3</sup> uses reference fragment ion spectra as prior information to detect and  
44 quantify proteolytic peptides in complex samples as surrogates for their corresponding proteins.  
45 Peptide-centric analyses have been implemented at a moderate level of multiplexing (tens to few  
46 hundred proteins) via selected reaction monitoring (SRM<sup>4</sup>) and parallel reaction monitoring (PRM<sup>5</sup>).  
47 More recently, massively parallel data independent analysis strategies (DIA) exemplified by SWATH-  
48 MS have been developed that reproducibly quantify tens of thousands of peptides from single  
49 sample injections into a mass spectrometer<sup>6-8</sup>. In this manuscript we describe and implement the  
50 concept of complex centric analysis. It is intended to systematically detect protein complexes in  
51 biological samples and to quantify the distribution of proteins across protein complex instances.  
52 Complex-centric analysis uses generic protein interaction information as prior information and  
53 conceptually extends the principles of peptide-centric analysis to the level of protein complexes.  
54 Complex-centric proteome profiling consists of the robust and proven technique of size exclusion  
55 chromatography (SEC) to fractionate native protein complexes, SWATH/DIA mass spectrometry to  
56 precisely and reproducibly quantify proteins across SEC fractions and a new computational analysis  
57 strategy implemented in *CCprofiler*. *CCprofiler* carries out fast and automated detection of protein  
58 complexes in datasets of quantitative protein maps from consecutive SEC fractions and controls error  
59 rates by means of a target-decoy based statistical model. It uses prior information from generic  
60 protein interaction maps to detect and quantify protein complexes in the sample. Complex-centric

61 protein profiling is a new implementation of the general concept of protein correlation profiling<sup>9-11</sup>  
62 that distinguishes itself from earlier implementations<sup>12-14</sup> by the following: i) the use of SWATH-MS  
63 for the data generation provides complete protein elution profiles for each detected protein at  
64 quantitative accuracy and a wide dynamic range supporting the quantification of even minor  
65 components of the proteome, ii) the development of a statistical model in *CCprofiler* that uses a  
66 target/decoy model to calculate a FDR for detected complexes, and iii) the use of prior information  
67 from generic protein interaction maps to reduce the erroneous assignment of co-eluting proteins to  
68 a complex.

69 A range of generic protein complex compendia have been generated by different approaches that  
70 can be used as prior information for complex-centric analysis. They include: i) the CORUM reference  
71 database of complexes<sup>15</sup> generated by curating results from classical biochemical and biophysical  
72 analyses of protein complexes. CORUM presently contains 1753 distinct models of human complexes  
73 consisting of 2532 proteins; ii) The BioPlex network<sup>16</sup> and related protein interaction databases,  
74 generated by the mass spectrometric identification of proteins co-purifying with affinity tagged  
75 “bait” proteins (AP-MS). BioPlex v1.0 describes 23,744 interactions among 7,688 proteins identified  
76 as interactors of 2594 bait proteins; iii) the STRING database<sup>17</sup>, an organism-wide protein-protein  
77 interaction network generated by the computational integration of multiple lines of evidence for  
78 physical and functional associations. STRING (v10) contains 383,626 high confidence interactions  
79 (score  $\geq 900$ ) among 10,248 human proteins, and iv) protein complex databases generated by  
80 correlation profiling of extensive chromatographic co-fractionation of native complexes, followed by  
81 DDA mass-spectrometry<sup>12-14</sup>. In combination, these interaction compendia constitute an extensive,  
82 yet incomplete representation of the organization of the (human) proteome into functional  
83 complexes and thus provide an essential resource for the implementation of the complex centric  
84 analysis strategy that is supported by the computational framework *CCprofiler*.

85 We benchmark the method, including the *CCprofiler* algorithm, against a manually curated set of  
86 protein complexes and evaluate its complex identification performance against a reference method  
87 consisting of multidimensional co-fractionation of native extracts and DDA of individual fractions<sup>12</sup>.  
88 The results demonstrate high performance of the *CCprofiler* algorithm in relation to manual  
89 benchmarking, with observed true positive rates of up to 91 % (high quality signals) at an FDR of 5 %.  
90 The data further shows superior performance of the complex-centric approach in recalling protein  
91 complexes compared to the reference method, achieved at a significantly reduced experimental  
92 effort (81 vs. 1,163 fractions analyzed by LC-MS/MS). We applied the complex-centric proteome  
93 profiling strategy to quantify complexes in a native extract from HEK293 cells in exponential growth  
94 state. The results indicate that 55 % of the protein mass is present in the form of complexes that

95 distribute across distinct states of complex formation. The data indicated quantitative complex  
96 signals for 462 cellular assemblies if prior knowledge from the CORUM, BioPlex and StringDB  
97 reference databases was used and the results were cumulatively integrated. The utility of quantifying  
98 the distribution of specific proteins across different resolved submodules is exemplified by the  
99 identification of previously unknown substructures of cellular effector complexes such as the  
100 proteasome. Finally, we describe and provide access to *SECexplorer*, an interactive online platform  
101 for customized expert interpretation of quantitative co-fractionation protein profiles generated by  
102 SEC-SWATH-MS. We expect that the complex centric analysis method, the SEC-SWATH dataset  
103 representing the organization of the proteome of the cycling HEK 293 cell line and the computational  
104 tools to explore the data will find wide application in life science research.

## 105 Results

### 106 Principles and main features of complex-centric proteome analysis.

107 We describe an integrated mass spectrometric and computational method to systematically quantify  
108 the modular organization of the proteome. The method is schematically illustrated in Figure 1A and  
109 consists of five consecutive steps. First, complexes are isolated from a biological sample under mild  
110 conditions that retain their native form and fractionated according to their hydrodynamic radius via  
111 high-resolution size exclusion chromatography (SEC). Second, collected, consecutive fractions are  
112 subjected to bottom-up mass spectrometric analysis using SWATH/DIA mass spectrometry.

113 Collectively, the thus generated 81 SWATH/DIA maps constitute the dataset that will ultimately be  
114 explored by complex-centric analysis of protein SEC elution profiles (Step 5). To accurately quantify  
115 protein elution along the SEC chromatographic fractions, peptides are identified and quantified from  
116 the composite SWATH/DIA data set in step three by peptide-centric analysis<sup>7,18,19</sup>. Specifically,  
117 peptide query parameters for tens of thousands of peptides are generated from a reference spectral  
118 library and systematically queried across the dataset to quantify each target peptide in each fraction.  
119 Fourth, *CCprofiler* is used to infer quantitative protein elution profiles from the peptide elution  
120 profiles across SEC fractions (for details on peptide detection and protein inference along the  
121 chromatographic fractions see Figure S1). Fifth, the protein SEC elution profiles are explored via  
122 complex-centric analysis using *CCprofiler* along with prior protein interaction information, to detect  
123 distinct protein modules and to determine the likelihood that each detected module is correctly  
124 identified. Specifically, the complex-centric analysis of *CCprofiler* in steps four and five entails (Fig  
125 1B) (i) protein quantification, (ii) target complex query set generation based on prior protein  
126 connectivity information, (iii) the generation of corresponding decoy complex query sets used for  
127 downstream error estimation, (iv) detection of complex component subunit co-elution signals along  
128 SEC fractions, (v) decoy-based generation of a null model and according error estimation and, (vi)  
129 compilation of the results into a report detailing unique, chromatographically resolved instances of  
130 complexes and the distribution of shared protein subunits across them (For details, see extended  
131 experimental procedures).

### 132 Benchmarking and performance assessment

133 We evaluated the performance of the described complex-centric analysis method, (i) by  
134 benchmarking the *CCprofiler* algorithm and error model against a manually curated reference data  
135 set, (ii) by comparing its performance with the performance of a reference method consisting of  
136 multidimensional co-fractionation of native complexes and the proteomic analysis of 1,163 fractions  
137 by data dependent mass spectrometry<sup>12</sup>, and (iii) by demonstrating increased sensitivity for complex

138 detection as a result of the improved consistency of quantification of SWATH/DIA compared to data-  
139 dependent acquisition-based mass spectrometry (Figure 2).

140 Using the data generated from the HEK293 cell line proteome, we first benchmarked the automated  
141 performance of complex-centric analysis and FDR estimation by *CCprofiler* against a manually curated  
142 reference set (Figure 2A). The manual reference set was generated by manually testing protein  
143 complexes reported in the CORUM knowledgebase<sup>15</sup> for evidence of complete or partial co-elution  
144 signals among the protein level SEC chromatograms of the respective protein subunits (criteria:  $\geq 2$   
145 proteins show at least one chromatographic co-elution peak, as judged by visual expert inspection).  
146 Taking the manually annotated co-elution signals as ground truth, a false discovery rate (FDR) of the  
147 complex detection in *CCprofiler* could be estimated based on the number of automatically detected  
148 complex signals that were not confirmed by the manual reference set (manual FDR, also see  
149 extended experimental procedures). This manual reference based FDR was compared to the  
150 independent FDR estimation by the target-decoy approach (decoy FDR), demonstrating that the  
151 target-decoy model provides accurate or slightly conservative error estimates of the algorithm  
152 (Figure 2A). To further evaluate the sensitivity of *CCprofiler*, we tested the recall of manually  
153 detected signals by the automated analysis. At 5% decoy-estimated FDR, the automated *CCprofiler*  
154 analyses recalled 91% of the high-confidence manual signals and 76% of all manually annotated  
155 signals (Figure 2A and Figures S2A/B).

156 Second, we compared the performance of the complex-centric analysis method with the  
157 performance of a reference *de novo* complex analysis method implemented by Havugimana et al.  
158 which is based on multidimensional fractionation of native complexes isolated from HEK293 and  
159 HeLa cells<sup>12</sup> (Figure 2B). As a metric, we evaluated the ability of either method to recall complexes  
160 reported in the CORUM knowledgebase which consists of a total of 1753 non-redundant complexes.  
161 We considered a complex as recalled if at least 50 % of its CORUM annotated protein subunits were  
162 stated as part of a reported complex by either method (For details, see extended experimental  
163 procedures). The comparison comprised all 622 reported complexes from Havugimana et al. with  
164 unknown error rate, compared to the collapsed set of 462 complexes derived from complex-centric  
165 analysis of our HEK293 SEC-SWATH-MS dataset based on prior information from CORUM, BioPlex  
166 and StringDB, each independently filtered for 5% FDR. The results show that the complex-centric  
167 analysis method recalled 731 complexes from 81 fractions generated by single dimension SEC,  
168 compared to 561 complexes recalled from 1,163 fractions by the multidimensional reference method  
169 <sup>12</sup> (Figure 2B). The results also show a large agreement (438) between the recovered CORUM  
170 complexes. However, both datasets also uniquely recall parts of the CORUM complexes (123  
171 complexes were uniquely confirmed by Havugimana et al. and 293 by our workflow, respectively).



172 Due to a lack of ground truth in terms of the set of biologically present protein complexes in each  
173 respective dataset, ultimate conclusions on the correctness of each set of reported complexes  
174 remains challenging. However, these results demonstrate that a single-fractionation mass  
175 spectrometry dataset analyzed by complex-centric proteome profiling can retrieve comparable, if not  
176 more comprehensive information on the protein complex landscape, as compared to previous  
177 multidimensional fractionation efforts including a fourteen times higher number of sample injections  
178 coupled to *de novo* complex analysis.

179 Third, to assess the contribution of SWATH/DIA quantification to the favorable recall results of the  
180 complex-centric proteome profiling workflow, we compared results obtained by SWATH/DIA based  
181 protein quantification with those obtained by MS1 signal integration or spectral counting when the  
182 same samples were analyzed by DDA. To generate the DDA dataset, aliquots of the peptide samples  
183 of the 81 SEC fractions analyzed by SWATH/DIA were also analyzed by data-dependent acquisition on  
184 the same TOF model 5600 mass spectrometer that was also used for SWATH/DIA acquisition. Results  
185 are shown in Figure 2C. At a respective protein-level FDR control of 1 %, SWATH/DIA quantifies 4916  
186 proteins across the SEC fractions ( $\geq 2$  independent proteotypic peptides), whereas the DDA data only  
187 covers 4176 proteins when analyzed by MS1 quantification based on the top2 intensity sum, and  
188 4497 proteins when quantified by spectral counting (for details on the respective data analysis  
189 strategies see extended experimental procedures). To further assess the differences between DIA  
190 and DDA quantification, we next analyzed the three datasets with respect to the consistency of  
191 protein detection and quantification along consecutive SEC fractions (Figure 2C, left panel). The  
192 results indicate that SWATH/DIA detects and quantifies a substantially higher number of proteins in  
193 three or more consecutive fractions compared to DDA based analyses. Next, the precision of  
194 quantification as judged by global correlation among quantitative profiles of peptides originating  
195 from the same parent protein was compared between SWATH/DIA and DDA quantification, showing  
196 favorable quantification precision for SWATH/DIA (Figure 2C, middle panel). Finally, the DIA and DDA  
197 datasets were compared by their performance in detecting protein complexes (Figure 2C). At 5%  
198 controlled FDR, complex-centric analysis provides co-elution evidence for 621 versus 298 and 343 of  
199 the CORUM set of query complexes from quantitative data from SWATH-MS2, DDA-MS1 and DDA-  
200 spectral counting, respectively. Overall, these results demonstrate the favorable quantitative  
201 characteristics of SWATH/DIA data compared to DDA based analyses of data acquired on the same  
202 Triple TOF model 5600 mass spectrometer (also see Figure S2C).

203 The presented results demonstrate that automated complex-centric analysis by *CCprofiler* allows  
204 protein complex detection at a high sensitivity compared to manual inspection and that the system  
205 provides an accurate decoy model for FDR estimation. The data further suggests that complex-

206 centric proteome profiling achieves competitive complex detection performance of the overall  
207 workflow with only 81 LC-MS/MS measurements compared to a significantly larger scale  
208 multidimensional fractionation experiment. Furthermore, our comparative analysis attests  
209 SWATH/DIA more consistent and precise quantification when compared to DDA-based strategies and  
210 largely increased sensitivity in targeted, complex-centric profiling under strict error rate control.

### 211 [Complex-centric analysis of the HEK293 proteome: Insights into proteome modularity](#)

212 We applied the complex-centric proteome profiling method to study the modularity of the HEK293  
213 cell line proteome. Specifically, we first used the quantitative capacity of the method to estimate the  
214 fraction of the observed proteome that was, under the extraction conditions used, part of protein  
215 complexes as opposed to being present in monomeric form. Second, we tested the ability of the  
216 method to conclusively confirm the presence of specific complexes in the sample and third, we  
217 assessed the capability of the method to quantify the distribution of specific proteins across different  
218 complexes.

### 219 **Complex assembly state of the HEK293 proteome**

220 To globally assess the state of assembly of the HEK293 proteome under the extraction and SEC  
221 conditions used, we quantified for each of the 4916 proteins identified in the dataset (see above and  
222 extended experimental procedures) the proportion that was detected in assembled or monomeric  
223 state, respectively. To assign a protein signal to either state, we first calibrated a molecular weight  
224 scale of proteins expected in each SEC fraction using a reference set of proteins with known  
225 molecular weight (Figure S3). We then applied this scale to all detected proteins. We assigned  
226 proteins to an assembled state if they eluted from the SEC column at an apparent molecular weight  
227 that was minimally two times higher than the molecular weight indicated by the molecular weight  
228 scale (Figure 3A). To assess the distribution of proteins across distinct molecular weight regions,  
229 indicative of different assembly states as described above, we performed a protein-centric analysis of  
230 the 58,792 peptide-level chromatograms (Figure 3A, compare Figure 1A, Step 4). Our analysis  
231 identifies 5503 elution peaks for 4065 proteins (Supplemental Table 1), with no defined elution peaks  
232 observable from the remaining 851 proteins. Of these, 2668 proteins (66 %) were observed in at least  
233 one assembled state, whereas 1397 proteins (34%) were detected only in monomeric state, based on  
234 the criteria used (Figure 3B). Of the 4065 proteins, 1103 proteins (27 %) eluted in more than one  
235 peak and up to 6 elution peaks per protein were detected (Figure 3C). Proteins that were detected in  
236 multiple assembled states were enriched in proteasome components, ribosomal proteins and  
237 chaperones (Figure 3D). We further estimated the total protein mass that was detected in assembled  
238 vs. monomeric state by integrating the total MS signals observed for proteins assigned to assembled

239 or monomeric states. The results show that 55 % of the detected protein mass was in assembled  
240 state (Figure 3B).

241 Overall, these results indicate that a substantial fraction of the HEK293 proteome was detected in an  
242 assembled state, both in terms of distinct protein elution peaks and protein mass (Figure 3B). The  
243 results further demonstrate the capability of the method to quantify the distribution of proteins that  
244 are part of different distinct complex assemblies (Figure 3C).

#### 245 **Complex-centric detection and quantification of complexes**

246 As a next step we used the complex-centric workflow to confirm the presence of specific complexes  
247 in the HEK293 cell sample. The query complexes were predicted from the CORUM, BioPlex and  
248 StringDB reference databases of protein interactions, respectively, and the predictions were tested  
249 by *CCProfiler* using the 4916 protein SEC elution profiles detected in the dataset (Figure 4 and  
250 compare Figure 1A, Step 5). At a FDR of 5 % computed by the target-decoy model of *CCProfiler*,  
251 complex-centric analysis confirmed 621, 1052 and 1795 of the tested query complexes from the  
252 three respective input databases (For details, see extended experimental procedures and  
253 Supplemental Table 2). Notably, *CCprofiler* was able to confidently detect complexes consisting of the  
254 whole set of proteins predicted from the respective reference databases as well as complex signals  
255 comprising only a subset of the reference proteins, thus supporting the quantification of fully and  
256 partially assembled complexes. Up to this point in the analysis workflow, each protein complex signal  
257 detected by *CCprofiler* is directly linked to one specific protein complex query in the prior  
258 information dataset, derived from either CORUM, BioPlex or StringDB. However, some of the  
259 subunits in each complex query might overlap with other complex queries. One simple example  
260 would be that complex query A consists of subunits WXYZ and complex query B consists of subunits  
261 VXYZ. If only XYZ are detected as a co-elution group in the data, they will, until this point, be reported  
262 for both complex query A and B. In order to retrieve truly unique signals, the reported complex  
263 signals can finally be collapsed based on a strategy that considers (i) subunit composition and (ii)  
264 resolution in the chromatographic dimension. Taking the simple example from above, the signal  
265 collapsing step will merge the two features from complex query A (XYZ discovered from querying  
266 WXYZ) and B (XYZ discovered from querying VXYZ) to one unique protein signal XYZ that is  
267 independent from the original complex queries (For more details, see extended experimental  
268 procedures and Figure S4). According to this strategy, our integrated analysis across the three sets of  
269 complex queries identifies 462 unique protein-protein complex signals (Figure 4).

#### 270 **Complex-centric detection of complex variants**

271 The results above established the capacity of complex-centric profiling to detect and quantify subunit  
272 distribution across complexes that are resolved by SEC and contain common proteins. We therefore  
273 tested whether this capacity allowed us to detect novel protein modules of potential functional  
274 significance. Among the 621 complex models that were confirmed by CCProfiler following predictions  
275 from the CORUM database, 286 (46%) provided evidence of proteins common to two (152) and up to  
276 5 or more (27) distinct, chromatographically separated complex instances (Figure 5A). For example,  
277 the protein subunit fractionation profiles of the octameric COP9 signalosome complex, a central  
278 regulator of E3 ligase activity and turnover, delineate both the CSN holo-complex consisting of all  
279 eight subunits and a sub-complex consisting of subunits CSN1, CSN3 and CSN8 (Figure 5A&B). The  
280 critical role of CSN proteins in regulating the ubiquitin-proteasome system and cellular homeostasis  
281 has sparked great interest in the analysis in modules with variable subunit composition, and in  
282 mechanisms that regulate their activity<sup>20</sup>. CSN proteins have also been linked to cancerogenesis<sup>21-23</sup>.  
283 Both CSN assemblies detected in the HEK293 dataset elute with apparent molecular weights in  
284 accordance with a 1:1 stoichiometry. Further, the proteins CSN1/3/8 of the lower molecular weight  
285 complex form a connected sub-module within the CSN holo-complex structure<sup>24</sup> (Figure 5C). The  
286 occurrence of the distinct CSN1/3/8 complex detected in this study is consistent with protein  
287 chromatographic data generated by co-fractionation-MS/MS in two other laboratories. Wan et al.  
288 fractionated mild lysates of HEK293 cells by heparin ion exchange chromatography<sup>25</sup> followed by MS  
289 analysis. Also in this separation dimension that is orthogonal to SEC, the quantitative MS profiles  
290 show distinct co-fractionation of CSN1, CSN3 and CSN8 (Figure 5D, upper two panels). Larance et al.  
291 fractionated mild lysates of U2OS cells by SEC and the quantitative profiles of the CSN subunits also  
292 display distinct co-elution of CSN1, CSN3 and CSN8 at reduced molecular weight (Figure 5D, lower  
293 panel). While the data of both research groups generally support the model of CSN1/3/8 as a distinct  
294 cellular assembly, neither of them reported it as distinct from CSN holo-complex, likely owed to  
295 limited resolution of the experimental data and the pairwise-interaction-focused analysis workflows  
296 employed. Our findings suggest a potential functional role for the CSN sub-complex CSN1/3/8. We  
297 therefore tested whether CSN1, CSN3 and CSN8 could stably assemble independent of the remaining  
298 CSN components. We co-expressed human CSN1, CSN3 and CSN8 in insect cells, whereby CSN8 was  
299 added with an N-terminal Strep(II)-tag and CSN1 & CSN3 were expressed with and N-terminal His6-  
300 tags to facilitate reciprocal purification of the complex. The thus purified samples were analyzed by  
301 SDS-PAGE and resulting banding patterns confirmed the formation of a stable trimer CSN1/3/8 in the  
302 absence of the other CSN subunits that constitute the holo-complex (Figure 5D). Together, these  
303 results support the finding from the complex-centric identification of the CSN1/3/8 complex as a  
304 distinct substructure of the human COP9 Signalosome.

305 As a further example for the discovery of sub-complexes of a large holo-complex, complex-centric  
306 proteome profiling detected six variant signals from the subunit chromatograms of the 26S  
307 proteasome (Figure 6A). Two of the six variants represent known complexes, (i) the full 26S assembly  
308 and (ii) the 20S core particle (Figure 6A). The remaining four co-elution signals point towards complex  
309 variants of lower apparent molecular weight compared to the 26S and 20S particles (apex fractions  
310 39, 40, 42 and 46, ~ 107-222 kDa) that consist predominantly of  $\alpha$  and  $\beta$  subunits of the 20S core  
311 particle. These reported complex variants point towards (iii) a  $\beta$  subunit assembly of  $\beta 2$ ,  $\beta 3$  and  $\beta 7$  at  
312 fraction 39, (iv) a distinct assembly of  $\alpha$  subunits  $\alpha 2$  and  $\alpha 6$  at fraction 40, (v) an assembly  
313 intermediate of the seven  $\alpha$  subunits  $\alpha 1$ ,  $\alpha 2$ ,  $\alpha 3$ ,  $\alpha 4$ ,  $\alpha 5$ ,  $\alpha 6$  and  $\alpha 7$  at fraction 42, and (vi) a  $\beta 6$  and  
314 proteasome regulatory subunit 8 assembly at fraction 46. To evaluate whether the observed signals  
315 represent products of disassembly or complex biogenesis intermediates, we manually extended the  
316 automated analysis of CCProfiler by additionally aligning the quantitative protein traces of the  
317 chaperones known to be involved in 20S maturation with the respective complex subunits<sup>26</sup>(Figure  
318 6B). Strikingly, the distinctive co-elution of the early-stage specific chaperone PSMG3/PSMG4 dimer,  
319 constitutive chaperone PSMG1/PSMG2 dimer and the late-stage specific proteasome maturation  
320 factor POMP allowed us to classify the detected complex variants as early and late stage  
321 intermediates of 20S biogenesis (Figure 6B). Notably, a systematic manual analysis of the  
322 quantitative distribution of the proteasome and chaperone subunits across the detected complex  
323 variants suggests the  $\alpha 1/\alpha 3/\alpha 4/\alpha 5/\alpha 7$  and  $\alpha 1-7/\beta 2/\beta 3/\beta 6/\beta 7$  complexes, respectively, as the  
324 predominant early and late assembly intermediates on the path to 20S assembly, as assigned by  
325 defined co-elution and inferred interaction with the chaperones specifically involved in early  
326 (PSMG3/PSMG4 dimer) stages or late stages (POMP) of 20S proteasome biogenesis (Figure 6C).  
327 Although the automated workflow could not fully resolve and explain the data, it successfully  
328 pointed towards a distinct assembly of the alpha subunits (signal v) from the beta subunits (signal iii),  
329 as well as the differential behavior of  $\alpha 2$  and  $\alpha 6$  compared to the other  $\alpha$  subunits (signal iv). No  
330 underlying biology could be determined for signal vi.

331 Together, these findings demonstrate the capacity of complex-centric profiling to derive models of  
332 distinct variants of the queried complexes. These models can be reinforced by extending automated  
333 analyses by the alignment of additional proteins' quantitative profiles followed by manual inspection.

### 334 **SECexplorer – An interactive platform for complex-centric exploration of the HEK293 proteome** 335 **analyzed by SEC-SWATH-MS**

336 To support customized, expert-driven and in-depth analyses of protein co-fractionation profiles  
337 recorded by SEC-SWATH-MS of the HEK293 cell line, we set up the web platform *SECexplorer*.  
338 *SECexplorer* enables visualization and interactive browsing of protein fractionation profiles of user-

339 defined sets of proteins. Users can perform multiple tasks, including (i) testing of novel predicted  
340 models on complex formation between candidate proteins or (ii) interrogating the profile sets of  
341 known modules for evidence pointing towards new variants or (iii) manual refinement and extension  
342 of results obtained from automated complex-centric profiling, for example by extending the set of  
343 automatically detected complex components with additional proteins e.g. derived from the literature  
344 or from interaction network context. Analyses are assisted by the *CCprofiler* algorithm suggesting  
345 distinct co-elution signals and calculating their expected to apparent molecular weight mismatch,  
346 among other metrics, in order to speed up data interpretation by expert users. *SECexplorer* can be  
347 accessed at <https://sec-explorer.ethz.ch/> (Figure 7A). As an example for the use of *SECexplorer*, we  
348 followed up on the peak shoulder at elevated molecular weight observed in the CSN holo-complex  
349 co-elution signal (Compare Figure 5B). Overlaying the elution profiles of known components of a E3-  
350 CRL substrate of the COP9 Signalosome<sup>27</sup> revealed defined co-elution in the peak shoulder range,  
351 supporting the detection of a likely E3-CRL-bound subpopulation of CSN holo-complexes (Figure 7B).  
352 To derive a quantitative signal in the situation of only partial chromatographic resolution we  
353 employed a Gaussian deconvolution mixture model, suggesting a substrate-bound fraction of CSN  
354 holo-complex of  $25 \pm 3$  % across the 8 subunits (Figures 7C and S5).

## 355 Discussion

356 In this paper we describe complex-centric proteome profiling, an integrated experimental and  
357 computational approach to detect and quantify protein complexes isolated from their natural source,  
358 to generate new insights into the modular organization of proteomes.

359 The need to systematically analyze the organization of the proteome arises from the notion of a  
360 modular biology proposed by Hartwell et al.<sup>1</sup>. It essentially states that biochemical functions are for  
361 the most part catalyzed and controlled by functional modules, most frequently protein complexes,  
362 and that (genomic) perturbation of complexes results in perturbed biochemical functions and  
363 potentially in disease phenotypes. The notion of a modular biology thus extends the pioneering work  
364 of Pauling et al. on defining sickle cell anemia as a molecular disease<sup>28</sup> to the proteome level. Protein  
365 complexes and protein-protein interactions have been studied extensively by a wide range of  
366 techniques and have led to compendia of complexes<sup>15,16,29</sup> and maps of protein interaction  
367 networks<sup>16,30,31</sup>. These compendia have in common that they describe generic, usually static  
368 instances of complexes and interactions<sup>32-34</sup>. To distinguish between different biochemical states of a  
369 cell, it is also essential to determine qualitative and quantitative differences in functional modules in  
370 different samples. To date this has been attempted by two broad approaches. The first is based on  
371 microscopic methods including FRET<sup>35</sup> which provide outstanding resolution and precision of steric  
372 proximity but are labor intensive and focused on one to a few interactions at a time. The second is  
373 based on a mass spectrometric approach referred to as correlation profiling<sup>36</sup> in which samples of  
374 native modules are separated into a set of fractions and the protein contents of each fraction is  
375 determined by quantitative mass spectrometry. The association of a protein to a specific module is  
376 then asserted by the consistency of the quantitative pattern of the protein in question with other  
377 proteins of the same module<sup>37</sup>. Initially used to define the composition of the specific modules such  
378 as the large RNA polymerase II preinitiation complex<sup>37</sup> and the human centrosome<sup>38</sup>, correlation  
379 profiling has also been employed to broadly assign protein localization to different subcellular  
380 compartments<sup>39-41</sup> and the scope has been extended towards systematically interrogating protein-  
381 protein complexes by correlating protein patterns in fractions obtained from different biochemical  
382 fractionation methods<sup>9,11,42</sup>. Such studies have used different native complex separation methods  
383 including SEC, IEX, density gradient centrifugation and blue native gels<sup>9,11,42</sup>. The scientific scope has  
384 extended to the analysis of cells of different species, culminating in the description of hundreds of  
385 complexes in a single, albeit massive experiment<sup>25</sup>. Correlation profiling, therefore has the potential  
386 to determine the quantity and composition of hundreds of protein modules in a single operation.

387 In the present paper we describe a conceptual and technical advance in the field of correlation  
388 profiling. As a conceptual advance we introduce the principle of complex centric analysis. It is



389 inspired by the peptide-centric analysis concept employed for the specific and sensitive detection of  
390 peptides from proteomic samples in targeted proteomic approaches, such as SWATH/DIA<sup>6</sup>, and  
391 extends the use of prior information for the analysis of proteins to the level of protein complexes.  
392 Similar to peptide-centric analysis of SWATH/DIA data, high selectivity and sensitivity is achieved by  
393 focusing the analysis on analytes conceivably expected in the sample when querying the protein co-  
394 fractionation data for candidate protein complexes that are inferred from reference protein  
395 interaction maps. Thereby, prior information significantly constrains complex inference from co-  
396 fractionation profiling data and thus adds specificity and the possibility to develop a target-decoy  
397 model to assess the reliability of the obtained results. Furthermore, complex identifications are  
398 directly linked to quantitative chromatographic signals, a central feature of targeted proteomics  
399 approaches. As technical advances we demonstrate the benefits of SWATH/DIA for the analysis of  
400 the sequential SEC fractions, introduce a freely accessible computational framework *CCprofiler* and  
401 provide a tool facilitating the exploitation of complex-centric data, *SECexplorer* (Figure 7).

402 In combination, these technical and conceptual developments provide the following advances to the  
403 field of correlation profiling. First, the preferable quantitative performance of SWATH/DIA provides  
404 more complete and consistent sampling of the eluting proteome, resulting in fewer gaps and noise in  
405 the recorded profiles. This results in deeper insights into modular proteome organization, including  
406 the detectability of low abundance complex intermediates. Second, the use of prior information  
407 reduces false positive assignments of complex co-membership due to coincidental co-elution of  
408 proteins that do in reality not interact. Third, the *CCprofiler* pipeline introduces the first statistical  
409 target-decoy model to tightly control error rates in the inference of complexes from co-fractionation  
410 profiling experiments and represents a comprehensive, open-source platform to support complex-  
411 centric profiling of proteomes, irrespective of the fractionation method used. Fourth, the efficiency  
412 of information retrieval and thus overall method throughput is drastically increased when compared  
413 to current co-fractionation based complex analyses, generating comprehensive and accurate  
414 assessments of proteome arrangement from an order of magnitude less LC-MS experiments than  
415 necessitated earlier. Together, these advances transform the SWATH/DIA-based complex-centric  
416 proteome profiling into a robust, generally applicable technique supported by a freely accessible  
417 computational framework.

418 We applied complex-centric profiling to a native protein extract from exponentially growing Hek293  
419 cells. Collectively, the results demonstrate the superior performance of the technique compared to  
420 the state of the art and provide new biological insights, as follows. The analysis establishes estimates  
421 for the overall assembly state of a human proteome - 55 % of inferred protein mass and two thirds  
422 (66 %) of the observed protein species appear engaged in higher order assemblies; a lower-boundary



423 estimate given inevitable losses of associations in the experimental procedure. Besides detecting  
424 cumulatively 462 cellular complexes upon targeted analysis, the method in many instances resolves  
425 distinct variants of the expected complexes, such as sub-complexes that elute independently from  
426 the chromatographic column. While sub-complex signals may originate from artefactual disruption of  
427 cellular complexes, we demonstrate in two cases how orthogonal pieces of evidence can build  
428 confidence in the biological relevance of substructures assigned from defined subunit co-elution.  
429 First, we identified a new complex CSN1/3/8 as a sub-complex of the COP Signalosome (CSN)  
430 holocomplex that elicits crucial regulatory functions towards E3 ligase complexes and the ubiquitin  
431 proteasome system<sup>43</sup>. It is tempting to speculate that a putative function of the CSN1/3/8 sub-  
432 complex could be the negative regulation of CSN holocomplex activity, due to the fact that the sub-  
433 complex incorporates the subunit CSN1 which is involved in substrate recognition<sup>27</sup>, but does not  
434 contain the catalytically active CSN5 subunit. CSN5 embodies the de-neddylase activity to the CSN  
435 holocomplex<sup>27</sup>. CSN1/3/8 may potentially sequester neddylated E3 CRLs from CSN-mediated de-  
436 neddylation and thus affect their lifetimes and overall activity profiles. In a second example,  
437 complex-centric analysis in combination with manual refinement identified early and late assembly  
438 intermediates on the path towards the 20S proteasome particle. Strikingly, the early and late  
439 intermediary complexes assigned (early:  $\alpha 1/\alpha 3/\alpha 4/\alpha 5/\alpha 7$ , late:  $\alpha 1-7/\beta 2/\beta 3/\beta 6/\beta 7$ ) collide with  
440 current models of the temporal order of subunit assembly<sup>44,45</sup> (for a graphical summary, see Figure  
441 6B, lower panel). Current models entail early  $\alpha$ -ring intermediates lacking subunits  $\alpha 3$  and  $\alpha 4$ <sup>46</sup>. In  
442 contrast, our model suggests assembly of pre- $\alpha$ -ring intermediates composed of subunits  $\alpha 4$ ,  $\alpha 7$   $\alpha 5$   
443  $\alpha 1$  and  $\alpha 3$  (forming a connected substructure of the  $\alpha$ -ring in this order<sup>47</sup>) that lacks subunits  $\alpha 2$  and  
444  $\alpha 6$ . These join thereafter to complete the  $\alpha$ -ring, under involvement of the chaperone  
445 POMP/hUmp1. Current models further suggest that ordered  $\beta$ -ring assembly scaffolded by  $\alpha$ -rings in  
446 the sequence of  $\beta 2$ ,  $\beta 3$ ,  $\beta 4$ ,  $\beta 5$ ,  $\beta 6$ ,  $\beta 1$  and lastly  $\beta 7$ <sup>44,45</sup> help overcome a POMP-dependent  
447 checkpoint for dimerization into the mature 20S particle<sup>48</sup>. The detection of late assembly  
448 intermediate  $\alpha 1-7/\beta 2/\beta 3/\beta 6/\beta 7$  in our data suggests an alternate sequence of assembly with early  
449 incorporation of subunit  $\beta 7$  and dimerization after the recruitment of subunits  $\beta 1$ ,  $\beta 4$  and  $\beta 5$ .

450 These insights into complex biogenesis could prove valuable, for example, in the design of future  
451 therapeutic strategies aiming to counteract elevated proteasome expression and activity that has  
452 been associated with cancer pathobiology<sup>49</sup>. This is exemplified by current attempts to target  
453 proteasomal activity via the chaperone POMP<sup>50</sup> (Figure 6C). We expect that the data generated by  
454 complex-centric proteome profiling will lead to the discovery of other instances of characteristic  
455 protein complexes and sub-complexes and thus trigger research into their functional roles.

456 Despite the advances and benefits of complex-centric proteome profiling by SEC-SWATH-MS, the  
457 method has a number of limitations. i) The balance of stability of complexes and extractability in  
458 native form. Inevitably, associations are lost in the experimental procedure, most notably upon  
459 dilution imposed during lysis and subsequent size exclusion chromatography, reducing protein  
460 concentration by ca. five orders of magnitude from the cellular environment (ca. 300 mg/ml<sup>51</sup>) to the  
461 conditions on the SEC column (ca. 0.06 mg/ml). Consequently, complex detectability is limited by  
462 thermodynamic stability and despite best efforts towards minimizing complex disintegration (fast  
463 processing in the cold and analyte adsorption-free chromatography), thermodynamically labile  
464 interactions, particularly those with fast off-rates, are likely inaccessible by correlation profiling  
465 methods, including complex-centric proteome profiling. While first studies have evaluated chemical  
466 crosslinking as means to stabilize cellular modules for chromatographic analyses<sup>52</sup>, it remains an  
467 open challenge to identify uniformly beneficial crosslinking reagents and reaction conditions that  
468 yield optimal balance between stabilization of biologically relevant structures and artefactual cross  
469 linking across the full range of protein expression in the cell<sup>53</sup>.

470 Furthermore, complex-centric proteome profiling is limited to the scope of the prior knowledge on  
471 protein association employed. However, continued efforts to map cellular protein association space<sup>54</sup>  
472 and computational integration of multiple lines of experimental evidence<sup>29</sup> will continually improve  
473 the quality and completeness of the prior knowledge useable as input to targeted, complex-centric  
474 analyses. Extended reference protein interaction maps will support near-complete mapping of the  
475 complexes detectable in co-fractionation experimental data in the near future, supported by  
476 scalability of the target-decoy statistical model. That being said, the statistical model itself is limited  
477 to the assignment of an FDR on the evidence of detection of defined complexes in the complex query  
478 set. Future improvements could potentially support a robust statistical model covering also post-  
479 processing steps, such as collapsing of detected features across multiple complex query sets to  
480 unique co-elution signals.

481 SEC-SWATH-MS accelerates the mapping of cellular complexes. Whereas the method yields a similar  
482 coverage of complexes compared to state-of-the art at over fourteen times less LC-MS injections, it  
483 still required 81 fractions to be analyzed at 2 h gradient time per fraction, culminating in 162 h of net  
484 MS acquisition time. This fact limits the scope for cohort studies. However, this issue may well be  
485 alleviated soon, given anticipated improvements SWATH/DIA sample throughput with minimal loss  
486 of protein coverage that seem achievable because in SWATH/DIA acquisition the number of analytes  
487 quantified does much less strongly depend on gradient length than is the case for DDA  
488 acquisition. As a consequence of the high quantitative quality of the data, the increased efficiency of  
489 the method and the error model this study lays the foundation to conclusively quantify changes of

490 proteome organization as a function of cell state. Ultimately, extensions of our workflow will support  
491 the detection of subtle re-arrangements within proteomes that occur in response to perturbation or  
492 along central biological processes. Such insights will help foster our understanding of the importance  
493 of higher order organization of the parts to convey plasticity and regulation to cellular systems.

494

## 495 Author contributions

496 Conceptualization, R.A., M.G., B.C.C. and M.H.; Methodology, M.H., I.B., G.R.; Software, I.B., M.H.,  
497 G.R., R.H., M.F. and A.B.E.; Validation, M.H. and I.B.; Formal Analysis, M.H. and I.B.; Investigation,  
498 M.H.; Resources, M.G. and R.A.; Data Curation, I.B. and M.H.; Writing – Original Draft, M.H. and R.A.;  
499 Writing – Review & Editing, I.B., M.F., G.R., R.H., A.B.E., B.C.C., M.G. and R.A.; Completion Submitted  
500 Manuscript, M.H., I.B. and R.A.; Visualization, M.H., I.B. and R.H.; Supervision, B.C.C., M.G. and R.A.;  
501 Project Administration, M.H.; Funding Acquisition, R.A.

## 502 Acknowledgments

503 We thank all Aebersold and Gstaiger lab members for helpful discussions, and with special emphasis  
504 Betty Friedrich, Audrey van Drogen, Peter Blattmann, Hannes L. Roest, Ludovic Gillet and Yansheng  
505 Liu. We further thank Prof. Nicolas Thomä, Dr. Lingaraju Manjappa of the Friedrich Miescher Institute  
506 for Biomedical Research as well as Dr. Martin Renatus and Arnaud Decock of the Novartis Institutes  
507 for Biomedical Research for materials and guidance in COP9 signalosome subunit co-expression and  
508 co-purification experiments. We would also like to thank the Scientific IT Support (ID SIS) of ETH  
509 Zurich for support and maintenance of the lab-internal computing infrastructure (iPortal) and  
510 specifically Uwe Schmitt for his help with the SECexplorer setup. The project was supported by the  
511 SystemsX.ch projects PhosphoNetX PPM and project TbX to R.A., and the European Research Council  
512 (ERC-20140AdG 670821 to R.A.). M.H. was supported by a grant from Institut Mérieux. B.C.C. was  
513 supported by a Swiss National Science Foundation Ambizione grant (PZ00P3\_161435). A.B.E. was  
514 supported by the National Institutes of Health project Omics4TB Disease Progression (U19  
515 AI106761). I.B. was supported by the Swiss National Science Foundation (grant no. 31003A\_166435).

## 516 Conflict of Interests

517 The authors declare that they have no conflict of interest.

## 518 Experimental Procedures

### 519 Preparation of native HEK293 proteome and fractions for MS analysis

520 HEK293 cells were obtained from ATCC and cultured in DMEM containing 10 % FCS and 50 µg/mL  
521 penicillin/streptomycin to 80 % confluency. Ca. 7e7 cells were mildly lysed by freeze-thawing into  
522 0.5 % NP-40 detergent- and protease and phosphatase inhibitor containing buffer, essentially as  
523 described<sup>55</sup>, albeit without the addition of Avidin. Lysates were cleared by 15 minutes of  
524 ultracentrifugation (100,000×g, 4 °C) and buffer was exchanged to SEC buffer (50 mM HEPES pH 7.5,  
525 150 mM NaCl) over 30 kDa molecular weight cut-off membrane at a ratio of 1:50 and concentrated  
526 to 25-30 mg/ml (as judged by OD280). After 5 min of centrifugation at 16.9 ×g, 4 °C, the supernatant  
527 was directly subjected to fractionation on a Yarra-SEC-4000 column (300×7.8 mm, pore size 500 Å,  
528 particle size 3 µm, Phenomenex, CA, USA). Per SEC run, 1 mg native proteome (by OD280) was  
529 injected and fractionated at 500 µl/min flow rate at 4 °C, collecting fractions at 0.19 min per fraction  
530 from 10 to 28 minutes post-injection, fractions 3-83 of which were considered relevant proteome  
531 elution range and considered for further analysis with fractionation index 1-81. The fractions  
532 collected from two consecutive SEC fractionations of the same extract (2×1 mg) were pooled for  
533 subsequent bottom-up proteomic analysis. Apparent molecular weight per fraction was log-linearly  
534 calibrated based on column performance check protein mix analyzed prior and after each  
535 experimental replicate (AL0-3042, Phenomenex, CA, USA). An aliquot of the unfractionated mild  
536 proteome extract was included in peptide sample preparation and LC-MS analysis. Proteins were  
537 proteolyzed to peptide level by trypsin digestion (Promega V5111) in the presence of 1 % sodium  
538 deoxycholate (Sigma-Aldrich D6750), reduced, alkylated and de-salted on C18 reversed phase (96-  
539 Well MACROSpin Plate, The Nest Group, MA, USA) and each sample was supplemented with equal  
540 amounts of internal retention time calibration peptides (IRT kit, Biognosys, CH).

### 541 Baculoviral co-expression and co-purification

542 Sf21VM Cells were maintained in ExCell420 Medium in Erlenmeyer culture flasks shaking at 27.5 °C.  
543 Human COP9 Signalosome subunits bearing N-terminal Strep(II) or His6 tags were co-expressed by  
544 co-infection of Sf21VM cells with three baculoviral vectors obtained from Lingaraju et al.<sup>24</sup>. After  
545 48 h, cells were mildly lysed and COP9 signalosome subunits and complexes differentially affinity-  
546 purified on StrepTactin and Ni-NTA-coated magnetic beads (Qiagen) followed by bead boiling in SDS  
547 loading buffer and subunit detection via SDS PAGE and InstantBlue staining (Expedeon). Subunits  
548 were identified by size and in reference to individual expression and in-gel detection.

## 549 MS analysis

550 LC-MS analysis of peptide samples was performed in both DDA and SWATH/DIA acquisition mode on  
551 an AB Sciex TripleTOF 5600+ instrument (AB Sciex, MA, USA), side-by-side per sample, sliding from  
552 early to late-eluting fractions. On-line reversed phase chromatography fractionated peptide samples  
553 delivering at 300 nL/min flow a 120-min gradient from 2–35% buffer B (0.1% formic acid, 90%  
554 acetonitrile) in buffer A (0.1 % formic acid, 2% acetonitrile) on a self-packed picoFrit emitter packed  
555 with 20 cm column bed of 3  $\mu\text{m}$  200-Å Magic C18 AQ stationary phase, essentially as described<sup>6,55</sup>. In  
556 data-dependent acquisition (DDA), MS1 survey spectra were acquired for the range of 360–1,460  
557 m/z with a 500 ms fill time cap. The top 20 most intense precursors of charge state 2–5 were  
558 selected for CID fragmentation and MS2 spectra were collected for the range of 50–2,000 m/z, with  
559 100 ms fill time cap and dynamic exclusion of precursor ions from reselection for 15 s, essentially as  
560 described<sup>55</sup>.

561 Data-independent acquisition (SWATH/DIA) mass spectrometry was performed using an updated  
562 scheme of 64 variably sized precursor co-isolation windows optimized for human cell lysate MS signal  
563 density (SWATH<sup>®</sup> 2.0, essentially as described<sup>56</sup>). SWATH cycles (64 x 50 ms accumulation time) were  
564 interspersed by MS1 survey scans for the range of 360–1,460 m/z with a 250 ms fill time cap,  
565 resulting in an overall period cycle time of 3498 milliseconds. The MS2 mass range was set to 200 –  
566 2000 m/z.

## 567 Data processing

568 DDA-MS data were processed using the MaxQuant software package (version 1.5.3.17) with the  
569 human canonical SwissProt reference database (build Aug-2014), standard parameters and variable  
570 methionine oxidation and N-terminal acetylation enabled. Match between runs was enabled to  
571 facilitate ID transfer and more consistent MS1 quantification (from and to) between adjacent  
572 fractions. Raw peptide MS1 intensities of individual peptide precursor signals were further  
573 considered.

574 The SWATH/DIA-MS data were analyzed via targeted, peptide-centric analysis, querying > 200,000  
575 precursors based on the combined human assay library (CAL) in the SWATH fragment ion  
576 chromatograms, using a modified OpenSWATH<sup>7</sup>, PyProphet<sup>57,58</sup> and TRIC<sup>18</sup> workflow and the iPortal  
577 framework<sup>59</sup> to recover precursors at an experiment-wide assay-level (TRIC target) FDR of 5 %.  
578 Precursor-level results were summed per peptide and further filtered on chromatography-informed  
579 scores, controlling the false discovery rate on protein level to below 1 %, employing the simple  
580 target-decoy method as implemented in *CCprofiler*. The protein-level fraction of false targets was  
581 estimated using R/SWATH2stats<sup>60</sup>. Specific filtering rules were, first, eliminating all values part of

582 consecutive identification stretches below length three and, second, exclusion of peptides based on  
583 their quantitative fractionation pattern's average dissimilarity to those of sibling peptides (originating  
584 from the same parent protein, discarding peptides with average sibling peptide correlation  
585 coefficient (spc) below 0.316 to achieve an estimated FDR of < 1 % among the remaining 4958  
586 proteins (4916 of which quantifiable with  $\geq 2$  proteotypic peptides for downstream analyses).

587 Protein-centric analysis was performed within the *CCprofiler* framework, detecting protein elution  
588 signals among peptide SEC chromatogram sets grouped by parent SwissProt protein identifier (For  
589 details, see extended experimental procedures).

590 Complex centric analysis was performed within the *CCprofiler* framework, detecting complex elution  
591 signals among protein SEC chromatogram sets, defined by reference databases CORUM, BioPlex and  
592 StringDB (Compare Figure 1 and Figure 3). Protein level chromatograms were generated by summing  
593 the two highest intensity proteotypic peptide chromatograms. Complex queries as well as decoy  
594 complex queries were formulated from the reference databases by splitting variants and re-merging  
595 redundant human CORUM complexes (N = 1753 query groups) and by partitioning networks into  
596 query groups of one seed protein including all direct interactors at the confidence thresholds (BioPlex  
597 interaction probability  $\geq 0.75$  and StringDB interaction score  $\geq 900$ ). Decoy complex queries of  
598 matching number and size were formulated in reference to the input connectivity information,  
599 ensuring that decoy complex queries do not entail interacting subsets. Co-elution signals were then  
600 detected using the signal processing algorithm of *CCprofiler* in grid search mode over a range of  
601 processing parameter sets. Parameters and results were then selected to ensure precision of  $\geq 95$  %  
602 among the protein peak group signals, followed by summarizing signals to unique groups at defined  
603 chromatographic retention times, chromatographically resolved complexes and complex variants.

604 Generation of true positive reference sets of co-elution signals

605 To guide algorithm development and to evaluate extendibility of the target-decoy approach to the  
606 level of protein complexes, we manually curated protein subunit co-elution signals among the 1753  
607 protein chromatogram sets defined by the CORUM complexes.

608 A more comprehensive and detailed protocol for all data processing and analysis steps is provided in  
609 the extended experimental procedures. The mass spectrometry proteomics data have been  
610 deposited to the ProteomeXchange Consortium (<http://proteomecentral.proteomexchange.org>) via  
611 the PRIDE partner repository<sup>61</sup> with the dataset identifier PXD007038. The *CCprofiler* package is  
612 freely available on GitHub (<https://github.com/CCprofiler/CCprofiler/>) including a vignette describing  
613 the main functionalities and usage of the software (Supplemental item 1).

## 614 References

- 615 1. Hartwell, L. H., Hopfield, J. J., Leibler, S. & Murray, A. W. From molecular to modular cell  
616 biology. *Nature* **402**, C47-52 (1999).
- 617 2. Ahrens, C. H., Brunner, E., Qeli, E., Basler, K. & Aebersold, R. Generating and navigating  
618 proteome maps using mass spectrometry. *Nat. Rev. Mol. Cell Biol.* **11**, 789–801 (2010).
- 619 3. Ting, Y. S. *et al.* Peptide-Centric Proteome Analysis: An Alternative Strategy for the Analysis of  
620 Tandem Mass Spectrometry Data. *Mol. Cell. Proteomics* **14**, 2301–2307 (2015).
- 621 4. Picotti, P. & Aebersold, R. Selected reaction monitoring-based proteomics: workflows,  
622 potential, pitfalls and future directions. *Nat. Methods* **9**, 555–66 (2012).
- 623 5. Bourmaud, A., Gallien, S. & Domon, B. Parallel reaction monitoring using quadrupole-Orbitrap  
624 mass spectrometer: Principle and applications. *Proteomics* **16**, 2146–2159 (2016).
- 625 6. Gillet, L. C. *et al.* Targeted data extraction of the MS/MS spectra generated by data-  
626 independent acquisition: a new concept for consistent and accurate proteome analysis. *Mol.*  
627 *Cell. Proteomics* **11**, O111.016717 (2012).
- 628 7. Röst, H. L. *et al.* OpenSWATH enables automated, targeted analysis of data-independent  
629 acquisition MS data. *Nat. Biotechnol.* **32**, 219–23 (2014).
- 630 8. Navarro, P. *et al.* A multicenter study benchmarks software tools for label-free proteome  
631 quantification. *Nat. Biotechnol.* **34**, 1130–1136 (2016).
- 632 9. Liu, X., Yang, W., Gao, Q. & Regnier, F. Toward chromatographic analysis of interacting protein  
633 networks. *J. Chromatogr. A* **1178**, 24–32 (2008).
- 634 10. Dong, M. *et al.* A ‘tagless’ strategy for identification of stable protein complexes genome-wide  
635 by multidimensional orthogonal chromatographic separation and iTRAQ reagent tracking. *J.*  
636 *Proteome Res.* **7**, 1836–49 (2008).
- 637 11. Rudashevskaya, E. L., Sickmann, A. & Markoutsas, S. Global profiling of protein complexes:  
638 current approaches and their perspective in biomedical research. *Expert Rev. Proteomics* **13**,  
639 951–964 (2016).
- 640 12. Havugimana, P. C. *et al.* A census of human soluble protein complexes. *Cell* **150**, 1068–81  
641 (2012).
- 642 13. Kristensen, A. R. & Foster, L. J. in *Methods in molecular biology (Clifton, N.J.)* **1188**, 263–270  
643 (2014).



- 644 14. Kirkwood, K. J., Ahmad, Y., Larance, M. & Lamond, a I. Characterization of native protein  
645 complexes and protein isoform variation using size-fractionation-based quantitative  
646 proteomics. *Mol Cell Proteomics* **12**, 3851–3873 (2013).
- 647 15. Ruepp, A. *et al.* CORUM: the comprehensive resource of mammalian protein complexes--  
648 2009. *Nucleic Acids Res.* **38**, D497-501 (2010).
- 649 16. Huttlin, E. L. *et al.* The BioPlex Network: A Systematic Exploration of the Human Interactome.  
650 *Cell* **162**, 425–440 (2015).
- 651 17. Franceschini, A. *et al.* STRING v9.1: protein-protein interaction networks, with increased  
652 coverage and integration. *Nucleic Acids Res.* **41**, D808-15 (2013).
- 653 18. Röst, H. L. *et al.* TRIC: an automated alignment strategy for reproducible protein  
654 quantification in targeted proteomics. *Nat. Methods* **13**, 777–83 (2016).
- 655 19. Rosenberger, G. *et al.* A repository of assays to quantify 10,000 human proteins by SWATH-  
656 MS. *Sci. data* **1**, 140031 (2014).
- 657 20. Dubiel, D., Rockel, B., Naumann, M. & Dubiel, W. Diversity of COP9 signalosome structures  
658 and functional consequences. *FEBS Lett.* **589**, 2507–13 (2015).
- 659 21. Lee, M.-H., Zhao, R., Phan, L. & Yeung, S.-C. J. Roles of COP9 signalosome in cancer. *Cell Cycle*  
660 **10**, 3057–3066 (2011).
- 661 22. Gummlich, L., Rabien, A., Jung, K. & Dubiel, W. Deregulation of the COP9 signalosome–cullin-  
662 RING ubiquitin-ligase pathway: Mechanisms and roles in urological cancers. *Int. J. Biochem.*  
663 *Cell Biol.* **45**, 1327–1337 (2013).
- 664 23. Chen, J. *et al.* CSN6 drives carcinogenesis by positively regulating Myc stability. *Nat. Commun.*  
665 **5**, 5384 (2014).
- 666 24. Lingaraju, G. M. *et al.* Crystal structure of the human COP9 signalosome. *Nature* **512**, 161–5  
667 (2014).
- 668 25. Wan, C. *et al.* Panorama of ancient metazoan macromolecular complexes. *Nature* (2015).  
669 doi:10.1038/nature14877
- 670 26. Hirano, Y. *et al.* A heterodimeric complex that promotes the assembly of mammalian 20S  
671 proteasomes. *Nature* **437**, 1381–5 (2005).
- 672 27. Cavadini, S. *et al.* Cullin–RING ubiquitin E3 ligase regulation by the COP9 signalosome. *Nature*  
673 **531**, 598–603 (2016).



- 674 28. Pauling, L., Itano, H. A., Singer, S. J. & Wells, I. C. Sickle Cell Anemia, a Molecular Disease.  
675 *Science* **110**, 543–548
- 676 29. Drew, K. *et al.* Integration of over 9,000 mass spectrometry experiments builds a global map  
677 of human protein complexes. *Mol. Syst. Biol.* **13**, 932 (2017).
- 678 30. Rolland, T. *et al.* A Proteome-Scale Map of the Human Interactome Network. *Cell* **159**, 1212–  
679 1226 (2014).
- 680 31. Szklarczyk, D. *et al.* STRING v10: protein–protein interaction networks, integrated over the  
681 tree of life. *Nucleic Acids Res.* **43**, D447–D452 (2015).
- 682 32. Gstaiger, M. & Aebersold, R. Genotype–phenotype relationships in light of a modular protein  
683 interaction landscape. *Mol. Biosyst.* **9**, 1064 (2013).
- 684 33. Havugimana, P. C., Hu, P. & Emili, A. Protein complexes, big data, machine learning and  
685 integrative proteomics: lessons learned over a decade of systematic analysis of protein  
686 interaction networks. *Expert Rev. Proteomics* **14**, 845–855 (2017).
- 687 34. Mehta, V. & Trinkle-Mulcahy, L. Recent advances in large-scale protein interactome mapping.  
688 *F1000Research* **5**, (2016).
- 689 35. Song, Y., Madahar, V. & Liao, J. Development of FRET Assay into Quantitative and High-  
690 throughput Screening Technology Platforms for Protein–Protein Interactions. *Ann. Biomed.*  
691 *Eng.* **39**, 1224–1234 (2011).
- 692 36. Foster, L. J. *et al.* A mammalian organelle map by protein correlation profiling. *Cell* **125**, 187–  
693 99 (2006).
- 694 37. Ranish, J. A. *et al.* The study of macromolecular complexes by quantitative proteomics. *Nat.*  
695 *Genet.* **33**, 349–355 (2003).
- 696 38. Andersen, J. S. *et al.* Proteomic characterization of the human centrosome by protein  
697 correlation profiling. *Nature* **426**, 570–4 (2003).
- 698 39. Foster, L. J. *et al.* A mammalian organelle map by protein correlation profiling. *Cell* **125**, 187–  
699 99 (2006).
- 700 40. Dunkley, T. P. J. *et al.* Mapping the Arabidopsis organelle proteome. *Proc. Natl. Acad. Sci.* **103**,  
701 6518–6523 (2006).
- 702 41. Yan, W., Aebersold, R. & Raines, E. W. Evolution of organelle-associated protein profiling. *J.*  
703 *Proteomics* **72**, 4–11 (2009).

- 704 42. Dong, M. *et al.* A ‘tagless’ strategy for identification of stable protein complexes genome-wide  
705 by multidimensional orthogonal chromatographic separation and iTRAQ reagent Tracking. *J.*  
706 *Proteome Res.* **7**, 1836–1849 (2008).
- 707 43. Dubiel, D., Rockel, B., Naumann, M. & Dubiel, W. Diversity of COP9 signalosome structures  
708 and functional consequences. *FEBS Lett.* **589**, 2507–13 (2015).
- 709 44. Im, E. & Chung, K. C. Precise assembly and regulation of 26S proteasome and correlation  
710 between proteasome dysfunction and neurodegenerative diseases. *BMB Rep.* **49**, 459–73  
711 (2016).
- 712 45. Hirano, Y. *et al.* Dissecting beta-ring assembly pathway of the mammalian 20S proteasome.  
713 *EMBO J.* **27**, 2204–13 (2008).
- 714 46. Hirano, Y. *et al.* A heterodimeric complex that promotes the assembly of mammalian 20S  
715 proteasomes. *Nature* **437**, 1381–1385 (2005).
- 716 47. Huang, X., Luan, B., Wu, J. & Shi, Y. An atomic structure of the human 26S proteasome. *Nat.*  
717 *Struct. Mol. Biol.* **23**, 778–785 (2016).
- 718 48. Li, X., Kusmierczyk, A. R., Wong, P., Emili, A. & Hochstrasser, M. beta-Subunit appendages  
719 promote 20S proteasome assembly by overcoming an Ump1-dependent checkpoint. *EMBO J.*  
720 **26**, 2339–49 (2007).
- 721 49. Voutsadakis, I. A. Proteasome expression and activity in cancer and cancer stem cells. *Tumour*  
722 *Biol.* **39**, 1010428317692248 (2017).
- 723 50. Goldberg, A. L., Zhao, J. & Collins, G. A. Blocking Cancer Growth with Less POMP or  
724 Proteasomes. *Mol. Cell* **59**, 143–5 (2015).
- 725 51. Milo, R. What is the total number of protein molecules per cell volume? A call to rethink some  
726 published values. *Bioessays* **35**, 1050–5 (2013).
- 727 52. Larance, M. *et al.* Global Membrane Protein Interactome Analysis using *In vivo* Crosslinking  
728 and Mass Spectrometry-based Protein Correlation Profiling. *Mol. Cell. Proteomics* **15**, 2476–  
729 2490 (2016).
- 730 53. Leitner, A., Faini, M., Stengel, F. & Aebersold, R. Crosslinking and Mass Spectrometry: An  
731 Integrated Technology to Understand the Structure and Function of Molecular Machines.  
732 *Trends Biochem. Sci.* **41**, 20–32 (2016).
- 733 54. Huttlin, E. L. *et al.* Architecture of the human interactome defines protein communities and

- 734 disease networks. *Nature* (2017). doi:10.1038/nature22366
- 735 55. Collins, B. C. *et al.* Quantifying protein interaction dynamics by SWATH mass spectrometry:  
736 application to the 14-3-3 system. *Nat. Methods* **10**, 1246–53 (2013).
- 737 56. Collins, B. C. *et al.* Multi-laboratory assessment of reproducibility, qualitative and quantitative  
738 performance of SWATH-mass spectrometry. *bioRxiv* (2016). at  
739 <<http://biorxiv.org/content/early/2016/09/14/074567>>
- 740 57. Reiter, L. *et al.* mProphet: automated data processing and statistical validation for large-scale  
741 SRM experiments. *Nat. Methods* **8**, 430–5 (2011).
- 742 58. Teleman, J. *et al.* DIANA--algorithmic improvements for analysis of data-independent  
743 acquisition MS data. *Bioinformatics* **31**, 555–62 (2015).
- 744 59. Kunszt, P. *et al.* iPortal: the swiss grid proteomics portal: Requirements and new features  
745 based on experience and usability considerations. *Concurr. Comput. Pract. Exp.* **27**, 433–445  
746 (2015).
- 747 60. Blattmann, P., Heusel, M. & Aebersold, R. SWATH2stats: An R/Bioconductor Package to  
748 Process and Convert Quantitative SWATH-MS Proteomics Data for Downstream Analysis  
749 Tools. *PLoS One* **11**, e0153160 (2016).
- 750 61. Vizcaíno, J. A. *et al.* The Proteomics Identifications (PRIDE) database and associated tools:  
751 status in 2013. *Nucleic Acids Res.* **41**, D1063–D1069 (2012).
- 752

Figure 1: Scheme of complex-centric proteome profiling by SEC-SWATH-MS

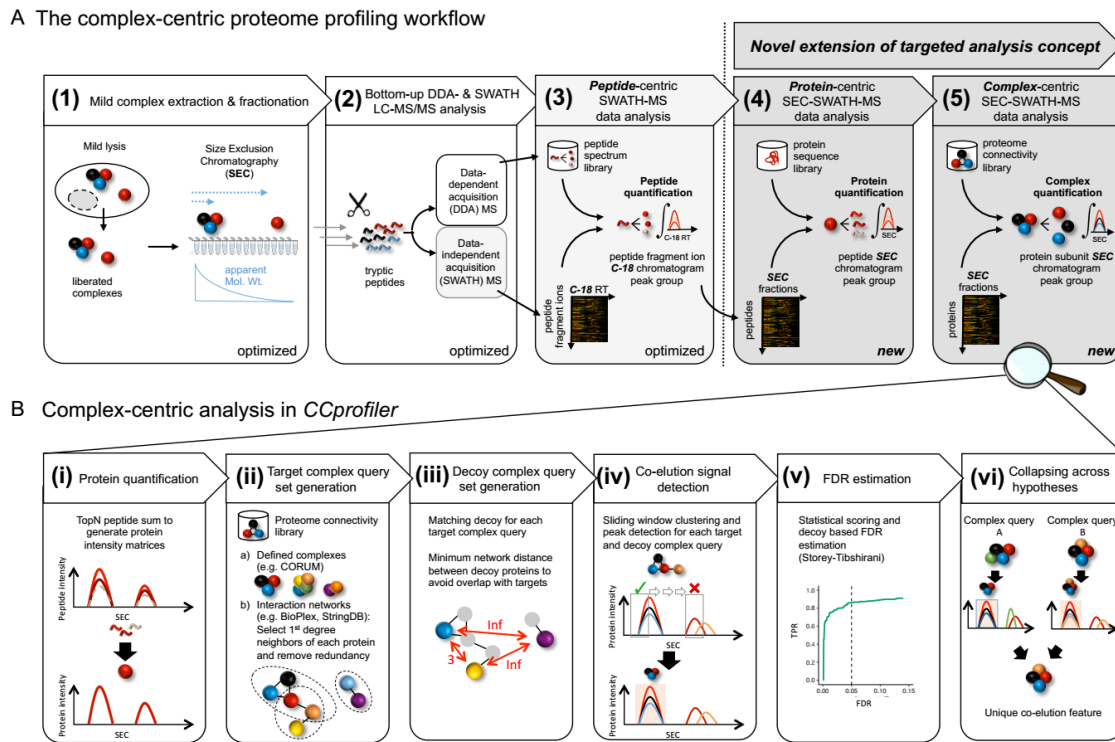

Figure 1: Scheme of complex-centric proteome profiling by SEC-SWATH-MS

**Figure 1: Scheme of complex-centric proteome profiling by SEC-SWATH-MS.** **A** Workflow to quantify cellular complexes in five steps, extending the targeted analysis concept from peptide-centric interpretation of SWATH-MS data to the levels of protein and protein complex detection from size exclusion chromatographic fractions (also see Figure S1). **B** Specific steps of targeted, complex-centric analysis of co-fractionation data in the *CCprofiler* package.

Figure 2: Benchmarking and performance assessment of complex-centric proteome profiling

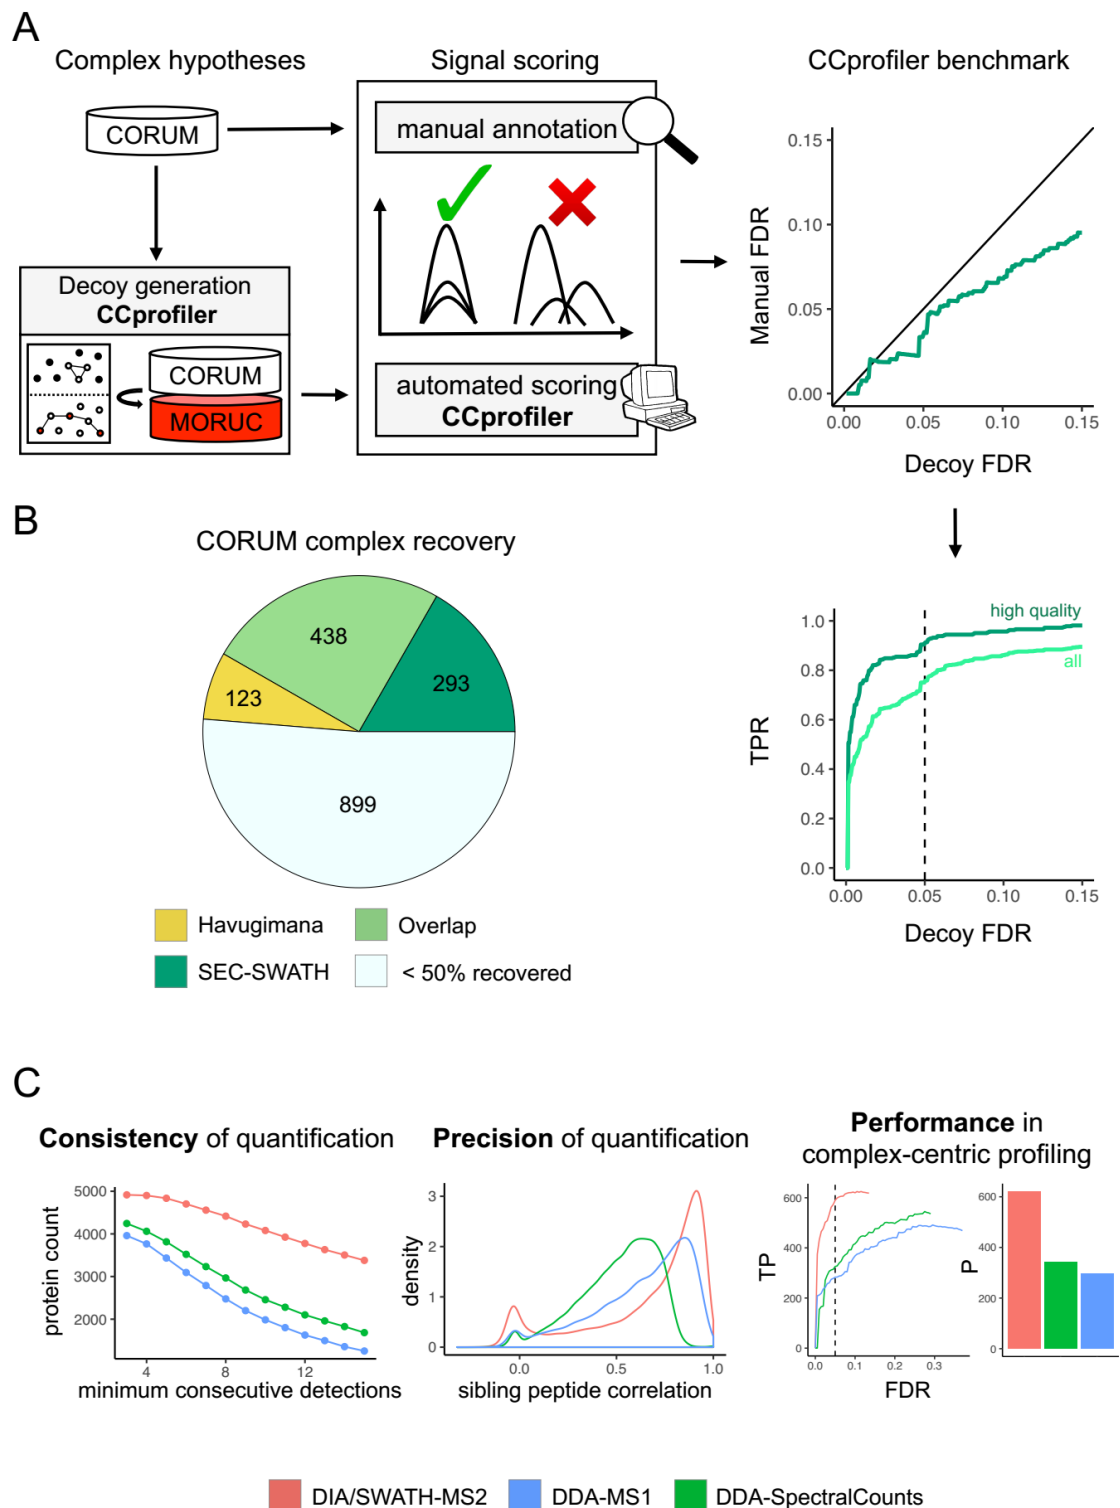

Figure 2: Benchmarking and performance assessment of complex-centric proteome profiling.

**Figure 2: Benchmarking and performance assessment of complex-centric proteome profiling. A**

Benchmark of *CCprofiler* algorithm and error model in reference to a manually curated reference set of signals displays conservative decoy-based FDR control and high sensitivity, recalling 91 % of high quality co-elution signals (also see extended experimental procedures and Figure S2A/B). **B**

Assessment of complex identification performance for the overall complex-centric profiling workflow employing CORUM, BioPlex and StringDB proteome connectivity priors, based on CORUM complex recovery in comparison to multidimensional co-fractionation and 1,176 LCMS-run-based complexome map (See Figure 4 and extended experimental procedures). **C** Comparison of SWATH-MS-based quantification to DDA-MS-based strategies (MS1 XIC and spectral counting) with regard to consistency (as judged based upon protein-level SEC chromatogram robustness towards increasing requirements on the number of consecutive detections) and precision (judged based on the correlation between sibling peptide SEC chromatograms) of quantification and overall performance in error-controlled complex-centric query of CORUM complexes in the respective protein level chromatogram sets (also see Figure S2C).

Figure 3: Detection of protein elution via protein-centric analysis.

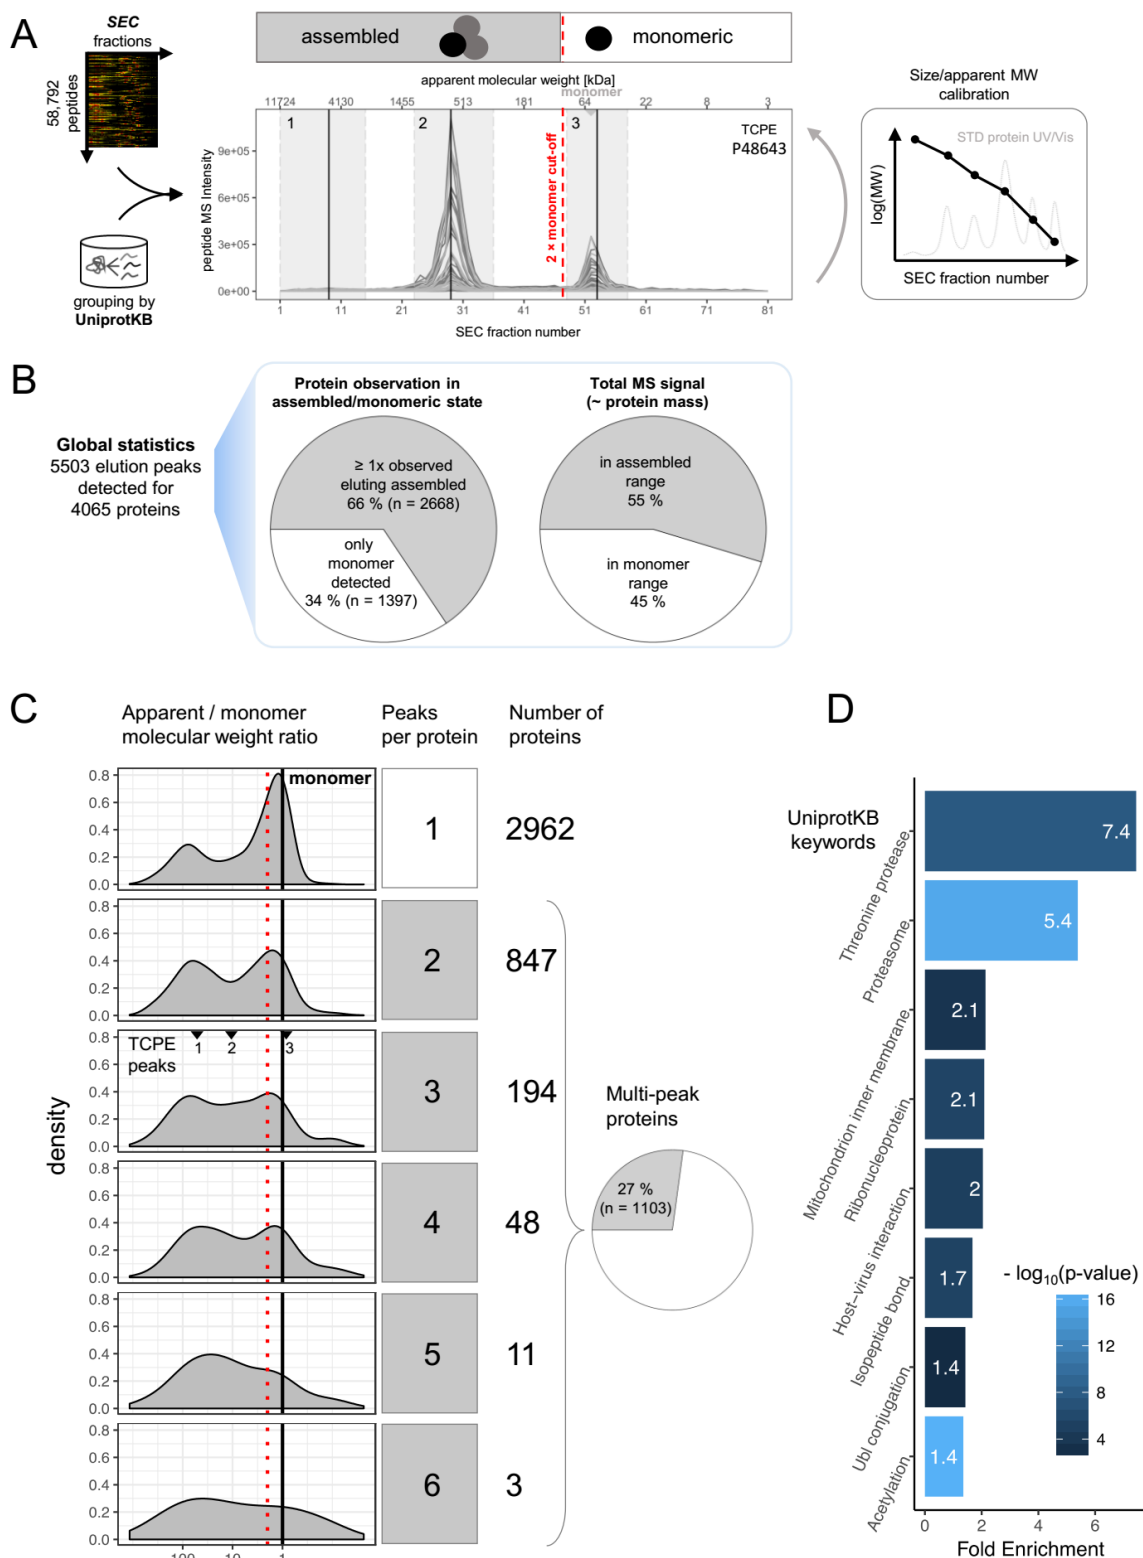

Figure 3: Detection of protein elution via protein-centric analysis.

**Figure 3: Detection of protein elution via protein-centric analysis. A** Peptide-level SEC

chromatograms are grouped by UniprotKB identifier to detect co-elution signals indicative of protein elution ranges/peaks. Based on external size calibration of the apparent analyte molecular weight per SEC fraction, signals can be attributed to likely assembled or monomeric state (also see Figure S3). For TCPE, three distinct elution signals, numbered 1-3, are detected, two in the assembled and one in the monomer elution range. **B** Global statistics of protein signal attribution to assembled or monomeric state. The majority of proteins (66 %) and protein mass (55 %) appear in assembled state in SEC-SWATH-MS. **C** Proteins are observed eluting in 1-6 distinct peaks and with a wide range of apparent vs. monomeric molecular weight ratios (distributions, left panels). The molecular weight ratios of the three peaks detected for TCPE (displayed in A) are indicated. Many of the proteins eluting in a single peak (top panel and bar) appear assembled. Proteins eluting multiple times (27 % of the proteins) do so preferentially in the assembled range, suggesting frequent participation in multiple differently sized macromolecular assemblies (lower panels and pie chart). For a list of all detected protein peaks, see Supplemental Table 1. **D** Proteins observed in multiple assembled peaks (n = 659) are enriched in components of the proteasome and other known large complex assemblies.



Figure 4: Complex-centric profiling of the HEK293 proteome by targeted query of CORUM, BioPlex and StringDB

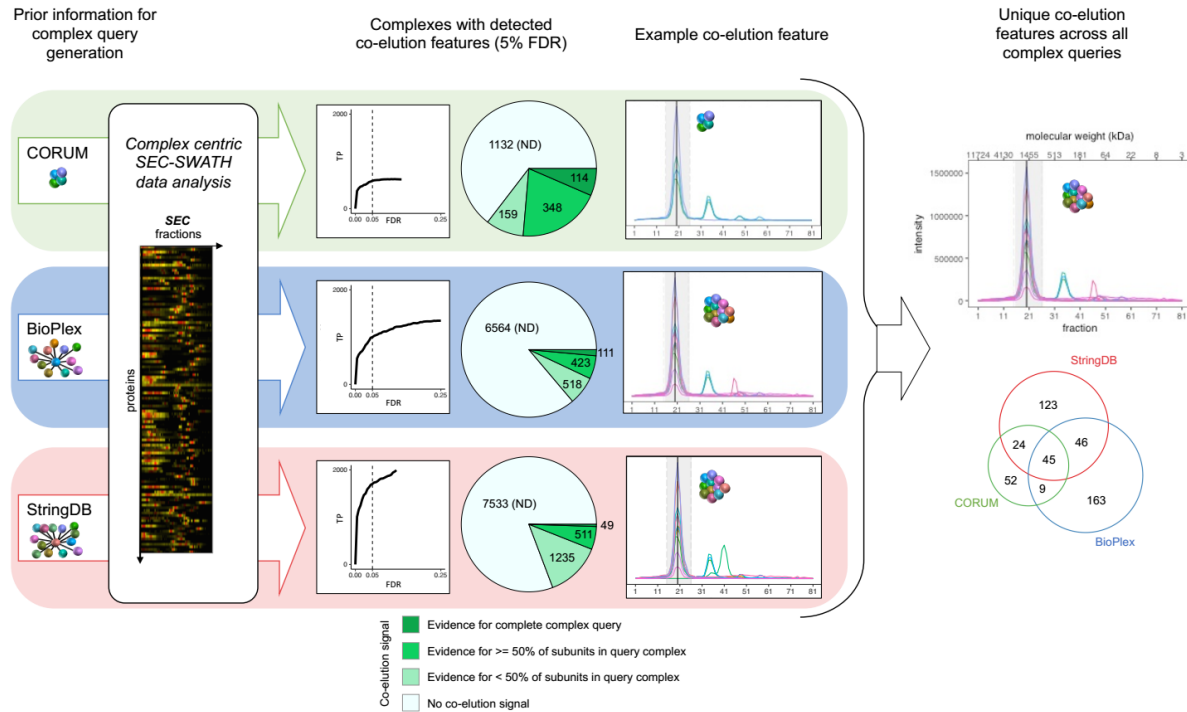

Figure 4: Complex-centric profiling of the HEK293 proteome by targeted query of CORUM, BioPlex and StringDB.

**Figure 4: Complex-centric profiling of the HEK293 proteome by targeted query of CORUM, BioPlex and StringDB.** Schematic overview of the targeted, complex-centric analysis of the protein-level co-fractionation map recorded in SEC-SWATH-MS via *CCprofiler*. The three-tiered analysis is centered on complex hypotheses (i.e. groups of proteins queried for co-elution in the SEC data) obtained from CORUM or formulated from BioPlex and StringDB. At complex hypothesis FDR controlled to 5 % via the decoy-based error model, co-elution evidence is confidently detected for 621, 1052 and 1795 (representing 35.4, 13.8 and 19.2 %) of the queried CORUM-, BioPlex- and StringDB-derived hypotheses, respectively. Heterogeneity and redundancy within and across the different hypothesis sets translates to the co-elution signals retrieved, which, pieced together by collapsing on composition and SEC elution fraction, identify 462 distinct, chromatographically resolved co-elution groups representative of distinct complexes or equisized families of complexes (also see Figure S4). For a list of all detected complex signals, see Supplemental Table 2.



Figure 5: Complex-centric detection of COP9 Signalosome variant CSN1/3/8

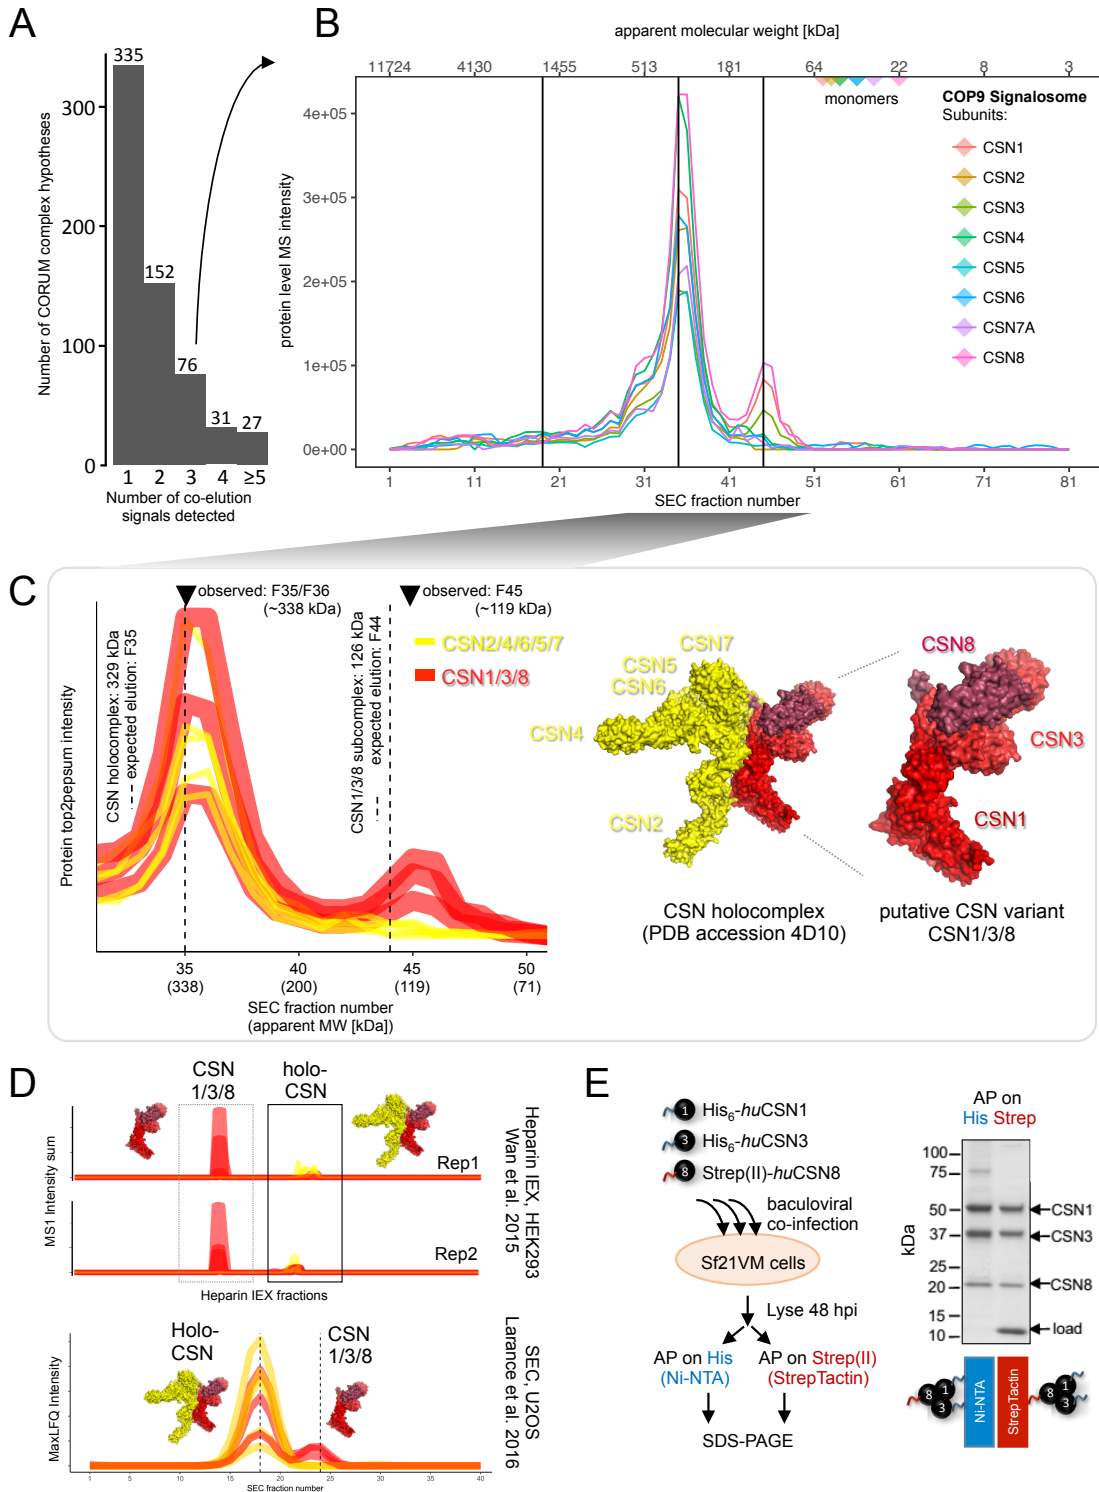

Figure 5: Complex-centric detection of COP9 Signalosome variant CSN1/3/8.

**Figure 5: Complex-centric detection of COP9 Signalosome variant CSN1/3/8.** **A** For nearly half the CORUM complex hypotheses queried, two or more distinct subunit co-elution signals were detected (See extended experimental procedures). **B** Among the four distinct co-elution signals detected from the eight canonical CSN subunits' chromatograms (here with CSN7A, not CSN7B) are two distinct signals delineating **C** distinct co-elution of holo-CSN (observed at the expected fraction 35) and Mini-CSN CSN1/3/8 (observed eluting offset only one fraction late, F45, of the expected fraction, F44). Expected fractions are estimated from the cumulative sum of one copy per component and external size calibration. Coloring adapted to highlight subversion components and their partitioning across holo- and sub-complex. CSN1/3/8 interact and form a submodule within the CSN holo-complex structure (PDB accession 4D10). **D** CSN1/3/8 display distinct fractionation patterns in co-fractionation experiments performed in other laboratories, specifically in orthogonal ion exchange fractionation of HEK293 lysates (Wan et al. 2015, upper panels) and size exclusion chromatographic fractionation of U2OS lysates (Larance et al. 2016, lower panel), in line with the CSN1/3/8 as distinct entity.

Figure 6: Complex-centric detection of 20S proteasome assembly intermediates

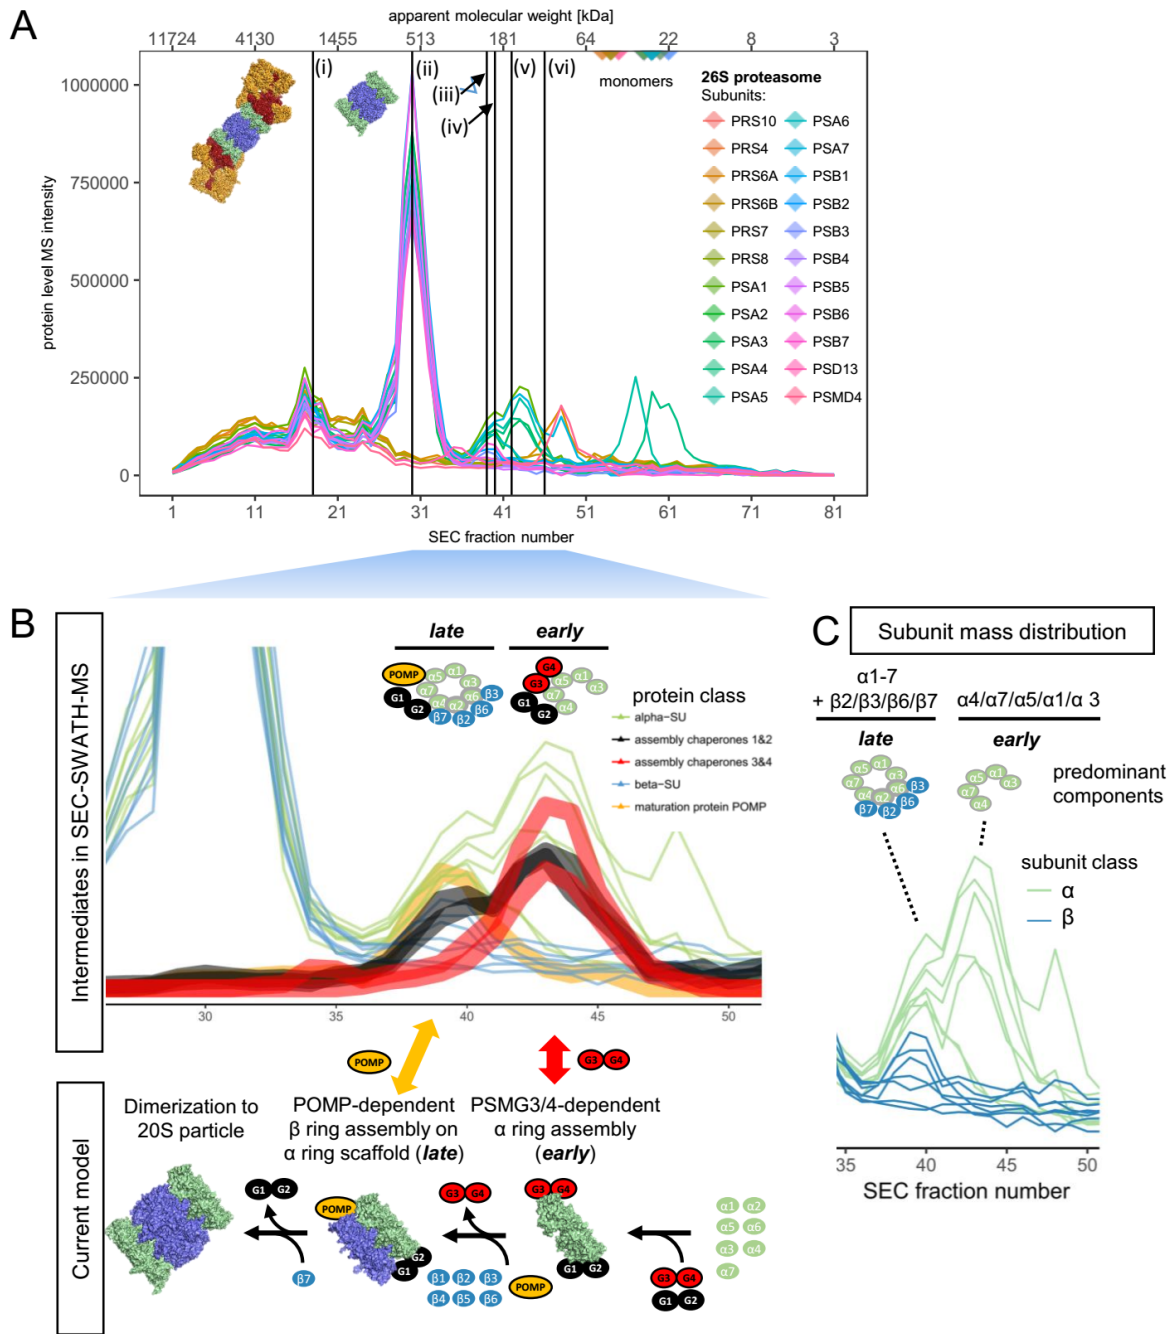

**Figure 6: Complex-centric detection of 20S proteasome assembly intermediates.**

**Figure 6: Complex-centric detection of 20S proteasome assembly intermediates.** **A** Protein-level SEC chromatograms of the 22 canonical 26S proteasome subunits. Vertical black lines indicate the apexes of six distinct co-elution signals detected in complex-centric scoring; two of which represent well-known co-occurring variants, the full 26S (i) and the 20S (ii) particle devoid the 19S lid and ATPase (Indicated by structural models, PDB accession 5GJR) and four of which, composed of predominantly 20S  $\alpha$  and  $\beta$  subunits, appear at reduced size (222 – 107 kDa, fractions 39, 40, 42 and 46). **B** Zoom in to chromatograms of 20S components in full and reduced MW range and in the context of chaperones known to be involved in assembly according to the current model of 20S biogenesis (lower panel, assembled after Saeki & Tanaka, 2012<sup>38</sup> and PDB accession 5GJR), colored by protein class. Reduced MW species are classified into early and late assembly intermediates (as opposed to artifacts of disassembly) by defined co-elution of early assembly chaperone PSMG3/PSMG4 dimer, late assembly chaperone proteasome maturation protein POMP and constitutive chaperone PSMG1/2 dimer. **C** Subunit mass distribution across early and late assembly intermediate elution ranges suggests predominant components of the intermediary species accumulating in HEK293 cells.

Figure 7: SECexplorer tool for customized interrogation of SEC-SWATH elution profiles

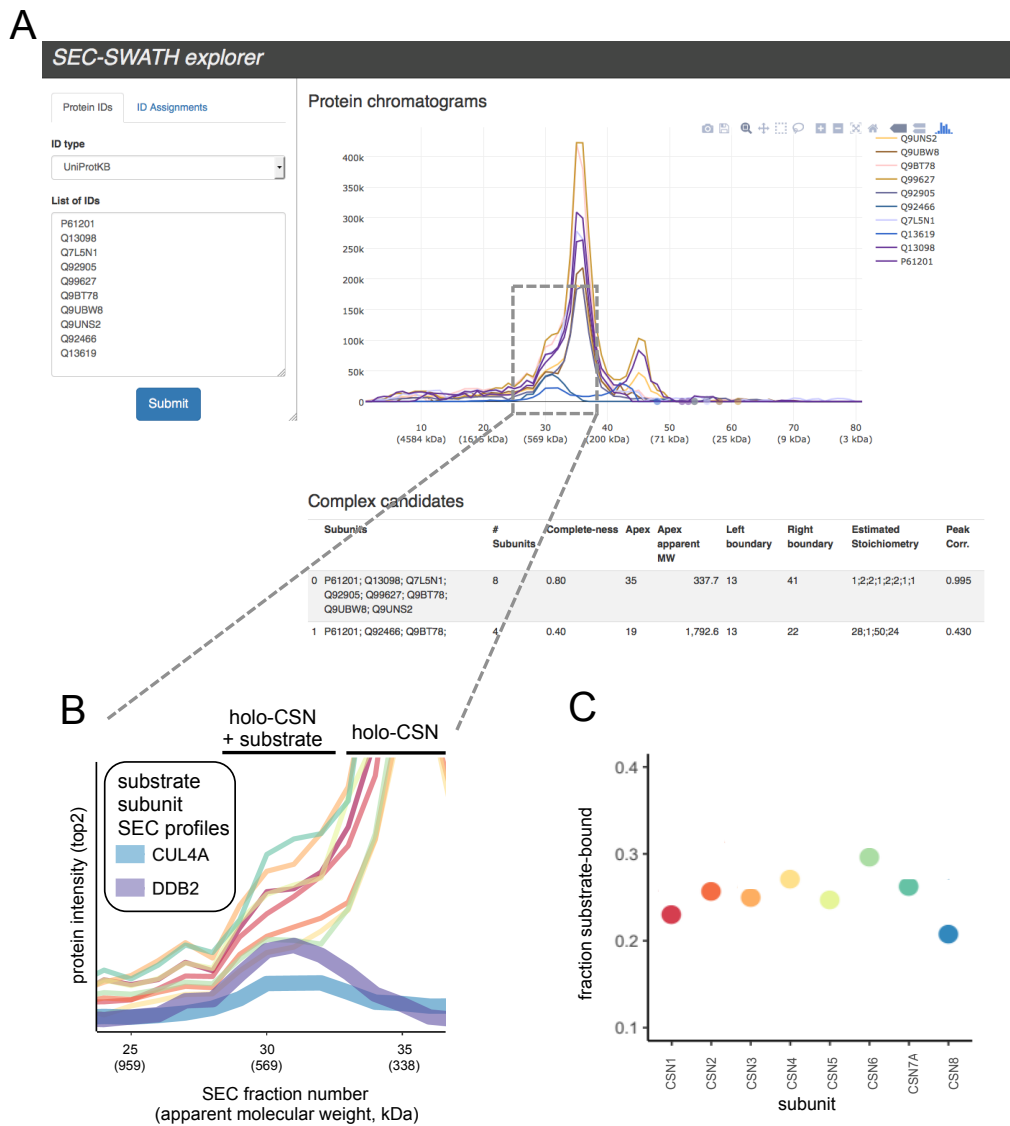

**Figure 7: SECexplorer tool for customized interrogation of SEC-SWATH elution profiles.**

**Figure 7: SECexplorer tool for customized interrogation of SEC-SWATH elution profiles. A**

SECexplorer web-interface for querying custom protein sets for co-elution behavior in the SEC-SWATH-MS data, viewing chromatograms for interpretation and with algorithmic assistance. **B** Zoom in to high MW peak shoulder of holo-COP9 Signalosome (compare Figure 5), where defined co-elution signals of CSN substrate components CUL4A and DDB2 suggest the partial resolution of substrate-bound and free pools of CSN holo-complex. **C** Estimation of the fraction of holo-CSN in the likely substrate-bound pool versus the free pool, with eight measurements along the eight subunits and based on Gaussian deconvolution of two signals underlying the observed peak and shoulder (also see Figure S5).
